# Supplementary material for: Metabolic Fingerprinting of Blood and Urine of Dairy Cows Affected by Bovine Leukemia Virus: A Mass Spectrometry Approach
Source: Preprints.org preprint supplement (doi:10.20944/preprints202410.1882.v1), 2024-10-24
Supplement: Supplementary file 1 [file supplementary]

1    **Supplementary Table 1.** Composition of the Prepartum Diet for Dry-Off Cows.

| Ingredient    | Weight/Cow (kg) | DM 1 (%) | Final DMI 1 (kg) |
|---------------|-----------------|----------|------------------|
| Hay           | 5.50            | 85.14%   | 4.68             |
| Oats          | 5.75            | 36.20%   | 2.08             |
| Corn          | 8.84            | 30.30%   | 2.68             |
| Protein       | 2.00            | 93.00%   | 1.86             |
| Ground Barley | 0.75            | 97.26%   | 0.66             |
| Minerals      | 0.42            | 97.26%   | 0.41             |
| Total         | 23.36           | 53.17%   | 12.37            |

2    <sup>1</sup>Dry matter intake (DMI) is computed by multiplying the percentage of dry matter (DM%) in the given feed by  
3    the weight (kg) of the offered feed. The daily DMI goal is established at 2% of the cow's body weight.

4    **Supplementary Table 2.** Nutritional Components in Early Lactation Cow Feeding.

| Ingredient      | Weight/Cow (kg) | DM 1 (%) | Final DMI 1 (kg) |
|-----------------|-----------------|----------|------------------|
| Hay Dairy       | 2.50            | 88.50    | 2.21             |
| Grass Silage    | 10.75           | 31.80    | 3.42             |
| Oats            | 5.99            | 36.20    | 2.17             |
| Barley-Dakota   | 11.50           | 40.00    | 4.80             |
| Corn            | 13.52           | 31.50    | 4.26             |
| Whey            | 2.75            | 17.00    | 0.47             |
| Protein         | 4.75            | 93.30    | 4.43             |
| Energy Dairy    | 4.25            | 88.00    | 3.74             |
| Ground Barley   | 1.75            | 88.00    | 1.54             |
| Mineral and Fat | 1.26            | 97.26    | 1.23             |
| Total           | 59.02           | 47.56    | 28.07            |

5    <sup>1</sup>Dry matter intake (DMI) is computed by multiplying the percentage of dry matter (DM%) in the given feed by  
6    the weight (kg) of the offered feed. The daily DMI goal is established at 2% of the cow's body weight.
